# Supplementary material
Source: PubMed Central journal article supplement (PMC3014281)
Supplement: supp_mol.110.068288_Supplemental_Material.pdf [file supp_mol.110.068288_Supplemental_Material.pdf]

***Molecular Pharmacology***

**Supplemental Material**

**for**

**Gastrin-Releasing Peptide/Neuromedin B Receptor Antagonists,  
PD176252 and PD168368, and Related Analogs are Potent Agonists of  
Human Formyl-Peptide Receptors**

Igor A Schepetkin<sup>a</sup>, Liliya N. Kirpotina<sup>a</sup>, Andrei I. Khlebnikov<sup>b</sup>,

Mark A. Jutila<sup>a</sup>, and Mark T. Quinn<sup>a</sup>

<sup>a</sup>Department of Veterinary Molecular Biology, Montana State University, Bozeman, MT 59717, USA

<sup>b</sup>Department of Chemistry, Altai State Technical University, Barnaul 656038, Russia

**Supplemental Table S1**  
Structures of Inactive Derivatives

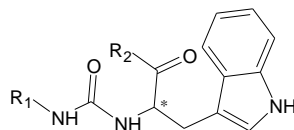

| Compound | R <sub>1</sub> | R <sub>2</sub>     | Enantiomer |
|----------|----------------|--------------------|------------|
| AG-10/23 |                | -O-CH <sub>3</sub> | S          |
| AG-10/24 |                | -O-CH <sub>3</sub> | S          |
| AG-10/25 |                |                    | R/S        |
| AG-10/26 |                |                    | R          |

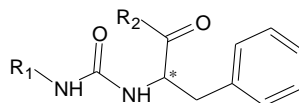

| Compound | R <sub>1</sub> | R <sub>2</sub> | Enantiomer |
|----------|----------------|----------------|------------|
| AG-10/27 |                |                | S          |
| AG-10/28 |                |                | S          |
| AG-10/29 |                |                | R/S        |
| AG-10/30 |                |                | R/S        |
| AG-10/31 |                |                | R/S        |
| AG-10/32 |                |                | R/S        |
| AG-10/33 |                |                | R/S        |

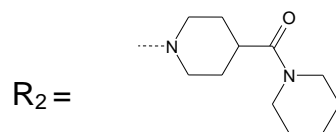

| Compound | R <sub>1</sub>                                                                    | Enantiomer | Compound | R <sub>1</sub>                                                                      | Enantiomer |
|----------|-----------------------------------------------------------------------------------|------------|----------|-------------------------------------------------------------------------------------|------------|
| AG-10/34 | 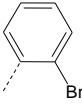 | S          | AG-10/38 |  | S          |
| AG-10/35 |  | S          | AG-10/39 |  | S          |
| AG-10/36 |  | S          | AG-10/40 |  | S          |
| AG-10/37 |  | S          | AG-10/41 |  | R          |

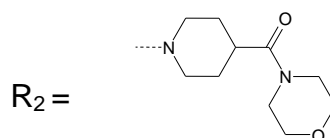

| Compound | R <sub>1</sub>                                                                      | Enantiomer | Compound | R <sub>1</sub>                                                                        | Enantiomer |
|----------|-------------------------------------------------------------------------------------|------------|----------|---------------------------------------------------------------------------------------|------------|
| AG-10/42 | 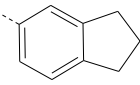 | S          | AG-10/46 |  | S          |
| AG-10/43 |  | S          | AG-10/47 |  | S          |
| AG-10/44 |  | S          | AG-10/48 |  | S          |
| AG-10/45 |  | S          | AG-10/49 |  | S          |

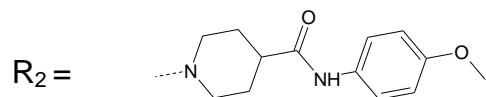

| Compound | R <sub>1</sub> | Enantiomer | Compound | R <sub>1</sub> | Enantiomer |
|----------|----------------|------------|----------|----------------|------------|
| AG-10/50 |                | S          | AG-10/54 |                | S          |
| AG-10/51 |                | R          | AG-10/55 |                | S          |
| AG-10/52 |                | R          | AG-10/56 |                | R          |
| AG-10/53 |                | R          | AG-10/57 |                | R          |

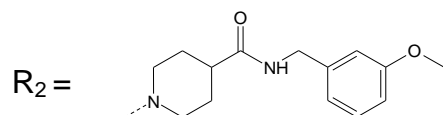

| Compound | R <sub>1</sub> | Enantiomer | Compound | R <sub>1</sub> | Enantiomer |
|----------|----------------|------------|----------|----------------|------------|
| AG-10/58 |                | S          | AG-10/62 |                | S          |
| AG-10/59 |                | R          | AG-10/63 |                | S          |
| AG-10/60 |                | S          | AG-10/64 |                | S          |
| AG-10/61 |                | S          | AG-10/65 |                | R          |

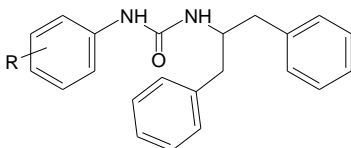

| Compound | R                   | Compound | R                   |
|----------|---------------------|----------|---------------------|
| AG-10/66 | 3-O-CH <sub>3</sub> | AG-10/69 | 2-CH <sub>3</sub>   |
| AG-10/67 | 3-Cl                | AG-10/70 | 2-Br                |
| AG-10/68 | 4-CH <sub>3</sub>   | AG-10/71 | 3-S-CH <sub>3</sub> |

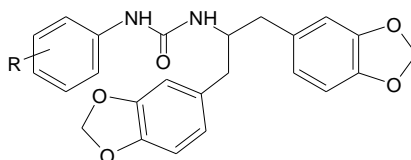

| Compound | R                                     | Compound | R                                   |
|----------|---------------------------------------|----------|-------------------------------------|
| AG-10/72 | 2-O-CH <sub>3</sub>                   | AG-10/84 | 2-O-CH <sub>2</sub> CH <sub>3</sub> |
| AG-10/73 | 3,4-di-CH <sub>3</sub>                | AG-10/85 | 4-O-CH <sub>2</sub> CH <sub>3</sub> |
| AG-10/74 | 3-Cl,4-F                              | AG-10/86 | 3-CH <sub>3</sub>                   |
| AG-10/75 | 3-O-CH <sub>3</sub>                   | AG-10/87 | 4-COO-CH <sub>3</sub>               |
| AG-10/76 | 3-Cl                                  | AG-10/88 | 3,5-di-O-CH <sub>3</sub>            |
| AG-10/77 | 4-CH <sub>2</sub> CH <sub>3</sub>     | AG-10/89 | 2-F                                 |
| AG-10/78 | 2,3-di-CH <sub>3</sub>                | AG-10/90 | 3,4-Ethylenedioxy                   |
| AG-10/79 | 2-COO-CH <sub>3</sub>                 | AG-10/91 | 2,4-di-F                            |
| AG-10/80 | 2,5-di-O-CH <sub>3</sub>              | AG-10/92 | 3,4-Methylenedioxy                  |
| AG-10/81 | 2-COO-CH <sub>2</sub> CH <sub>3</sub> | AG-10/93 | 3-S-CH <sub>3</sub>                 |
| AG-10/82 | 2-CH <sub>3</sub>                     | AG-10/94 | 3-COO-CH <sub>3</sub>               |
| AG-10/83 | 2-Br                                  | AG-10/95 | 3-F                                 |

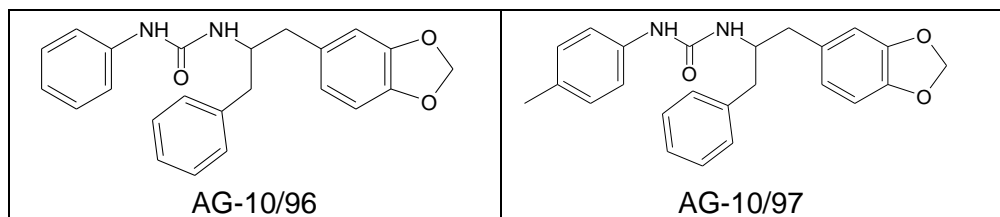

**Legend:** Compounds were evaluated for their ability to Ca<sup>2+</sup> mobilization in human neutrophils. The compounds shown were not active and induced either no Ca<sup>2+</sup> flux or had very low efficacy (<25% of positive control peptide) in human neutrophils. \*Location of the chiral center.
